# Supplementary material
Source: Springer Nature journal article supplement (https://www.springermedizin.de/resource/supplementary/12967_2009_381_MOESM4_ESM.pdf/9576348)

(A)

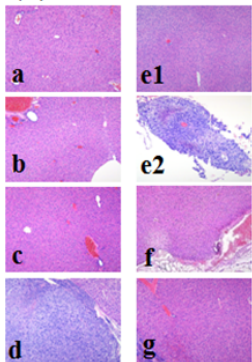

(X 100)

(B)

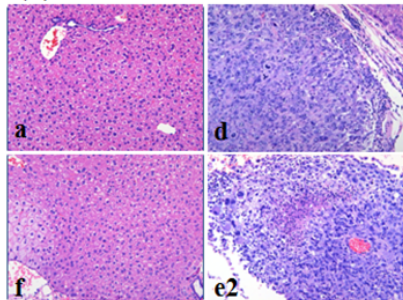

(X 200)

(C)

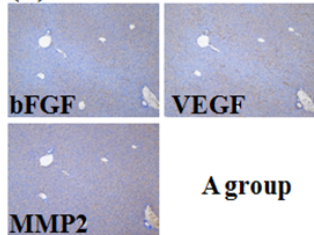

A group

(D)

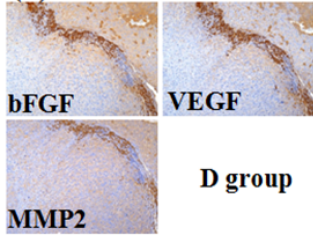

D group

(E)

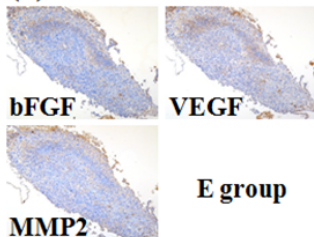

E group

(F)

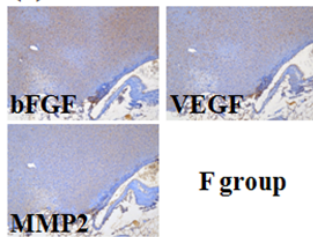

F group

Supplement: MOESM4 [file 9576348]
